# Supplementary material for: Molecular basis of the lipid-induced MucA-MucB dissociation in Pseudomonas aeruginosa
Source: PubMed Central journal article supplement (PMC7400510; doi:10.1038/s42003-020-01147-1), 2020-08-03
Supplement: 42003_2020_1147_MOESM1_ESM.pdf [file 42003_2020_1147_MOESM1_ESM.pdf]

Supplementary Figure 2.

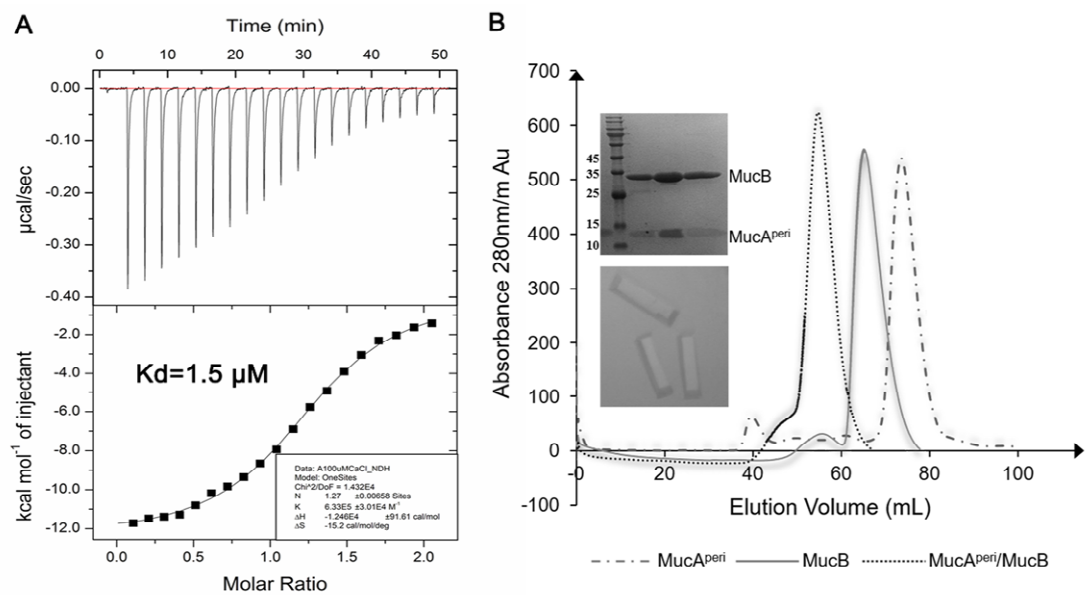

Supplementary Figure 2. (A) Isothermal titration calorimetry (ITC) analysis of MucA<sup>peri</sup> and MucB interaction. (B) The overlaid size exclusion chromatography profiles (Superdex<sup>TM</sup>-200, GE Healthcare) of MucA<sup>peri</sup>, MucB and MucA<sup>peri</sup>-MucB complex.

Supplementary Figure 3.

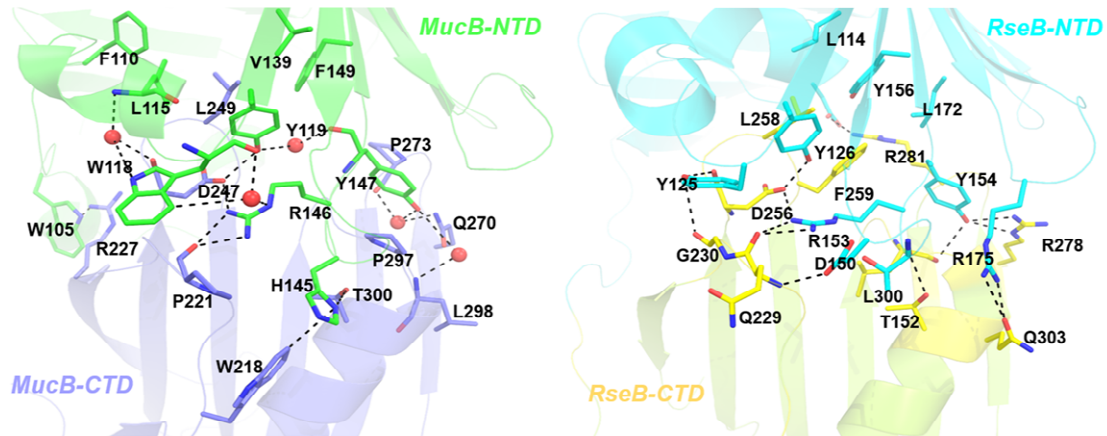

Supplementary Figure 3. The inter-domain interactions in MucB (Left) and RseB (Right). The key residues are shown with sticks, the water is shown with spheres and colored in red.

## Supplementary Figure 4.

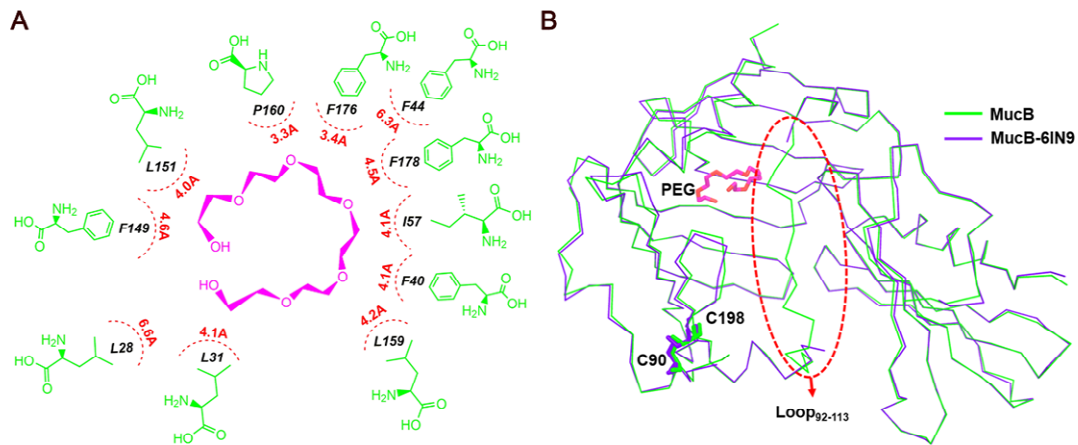

Supplementary Figure 4. (A) A schematic of the hydrophobic cavity in MucB, the polyethylene glycol (PEG) molecule is shown with pink stick and the distances between key residues and PEG molecule are shown. (B) Overview of superimposed of MucB and MucB-6IN9. A bound PEG molecule in our structure is shown as hot-pink sticks. The region of the dashed red is the position of loop<sub>92-113</sub>. In the structure of MucB-6IN9, loop<sub>92-113</sub> is too flexible to be detected.

## Supplementary Figure 5.

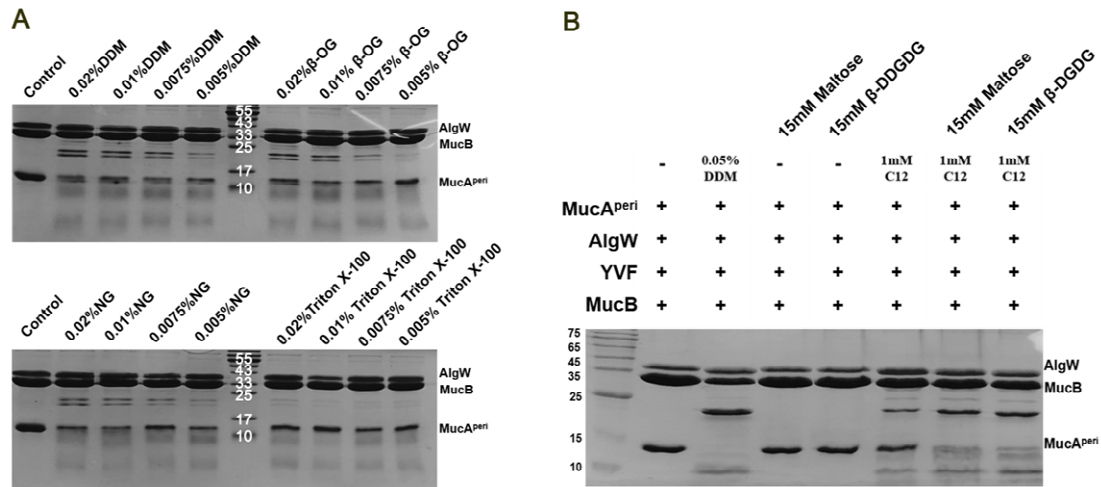

Supplementary Figure 5. (A) SDS-PAGE assay of MucA<sup>peri</sup> (125  $\mu$ M) degradation by AlgW (25  $\mu$ M) in the presences of MucB (130  $\mu$ M), YVF peptide (80  $\mu$ M), and different detergent concentration (DDM, NG,  $\beta$ -OG and TritonX-100). The fractions were incubated in degradation buffer (25mM Tris-HCl, PH 7.5, 150 mM NaCl) at 37 $^{\circ}$ C for 30 min. (B) The lauric acid (C12)-induced MucA<sup>peri</sup> cleavage process was obviously accelerated by adding disaccharides (15mM Maltose or  $\beta$ -D-Glucopyranosyl-D-glucose( $\beta$ -DGDG)), the fractions were incubated in degradation buffer (25mM Tris-HCl, PH 7.5, 150 mM NaCl) at 37 $^{\circ}$ C for 20 min.

## Supplementary Figure 6.

### Coverage:

1-80 MRTTSLLLLL GSLMAVPATQ AADASDWLNR LAEADRQNSF QGTFVYERNG SFSSTHEIWHR VESDGA VRER LLQLD GARQE  
81-160 VVRVDGR TQC ISGGLADQLA DAQLWPVRKF DPSQLASWYD LRLVGESRVA GRPAVVLAVT PRDQHR YGFE LHLDRDTGLP  
161-240 LKSLLLNEKG QLLERFQFTQ LNTGAAPAED QLQAGAECQV VGPAKADGEK TVAWRSEWLP PGFTLTRSFM RRSPTDPDV  
240-316 ACLTYGDGLA RFSVFIEPLH GAMVGDARSQ LGPTVVVSKR LQTTDDGGQMV TVVGEVPLGT AERVALSIRP EAAAQK

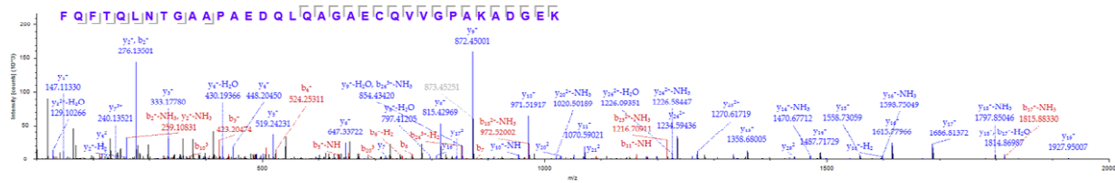

Supplementary Figure 6. Identification of cleavage fragments by Mass Spectrometry.

Top: The sequence identified after standard trypsin digestion and mass spectrometry had high sequence coverage with MucB. The detected sequence was colored in blue.

Bottom: The Mass spectrogram of a representative detected fragment sequence “QLLERFQFTQLNTGAAPAEDQLQAGAECQVVGPAKADGEK”.

Supplementary Figure 7.

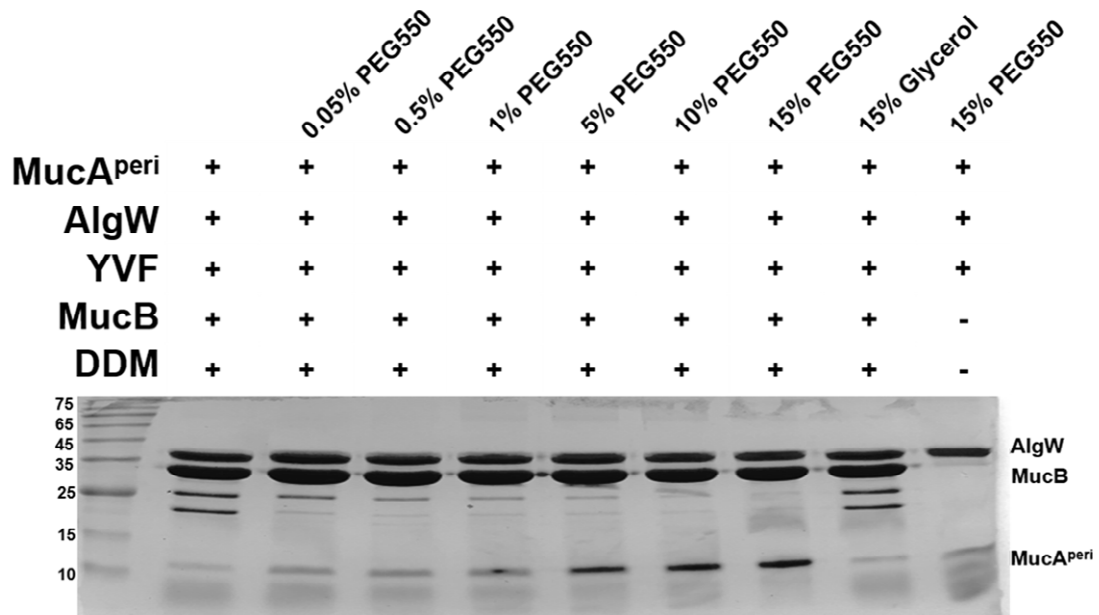

Supplementary Figure 7. PEG competed with the DDM for binding site in hydrophobic cavity of MucB and the protective effect was in a concentration-dependent manner. Gradient concentration of PEG550 (0.05%, 0.5%, 1%, 5%, 10%, 15%) was added in reaction system (125  $\mu\text{M}$  MucA<sup>peri</sup>, 25  $\mu\text{M}$  AlgW, 130  $\mu\text{M}$  MucB, 80  $\mu\text{M}$  YVF peptide, and 0.05% DDM) and incubated at 37°C for 30 min. As negative control, the penultimate column was performed by adding 15% glycerol in reaction system. The last column reaction system (without the protection of MucB) was positive control.



Supplementary Figure 8.

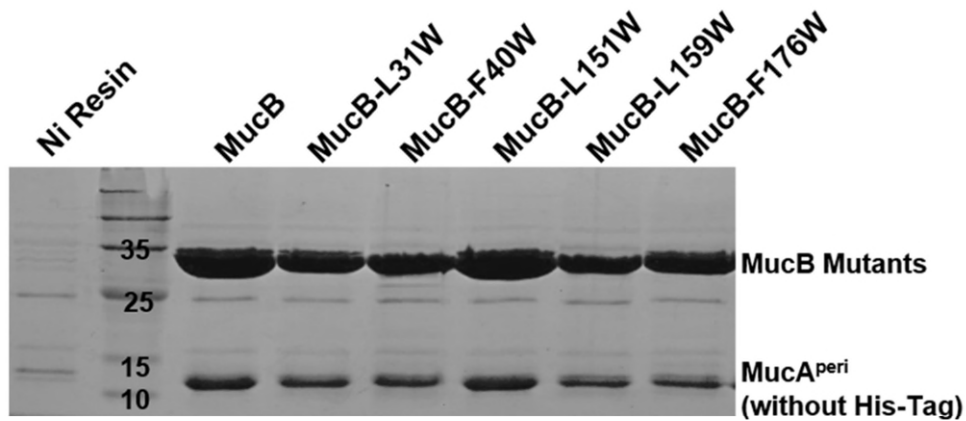

Supplementary Figure 8. His-affinity Pull-down assay. Incubate 75  $\mu$ g MucB or its variants (with His-tag) with excessive MucA<sup>peri</sup> (without His-tag, 72  $\mu$ g), the molar ratio of MucA<sup>peri</sup> to MucB was 3:1 to ensure excess of MucA<sup>peri</sup> interact with MucB or mutants. Fractions were eluted with solution buffer containing 300 mM imidazole and determined by 15% SDS-PAGE gel and visualized by Coomassie Brilliant Blue stain.

Supplementary Figure 9.

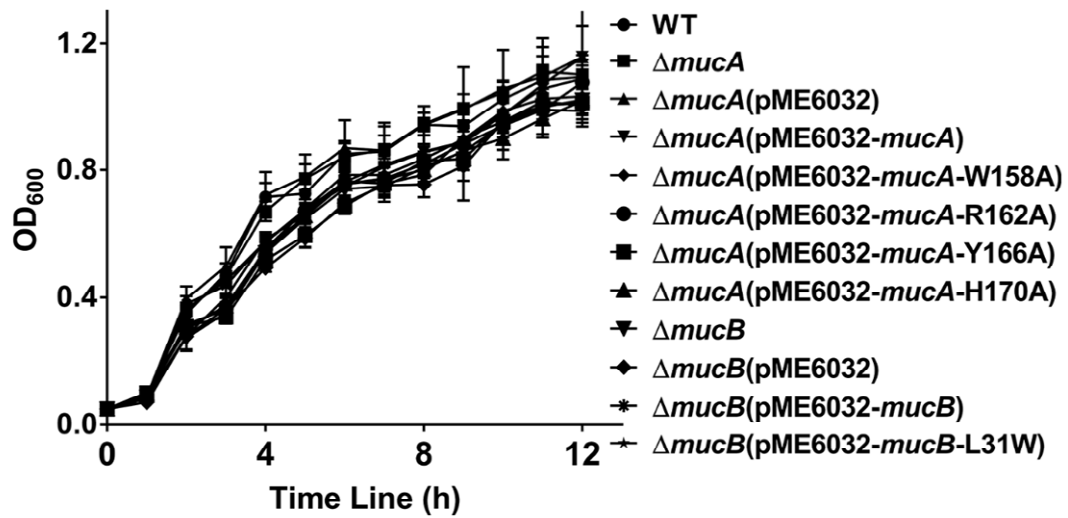

Supplementary Figure 9. The conventional growth curve determination of *P. aeruginosa* PAO1 and all mutations. Mutations exhibited no growth defect relative to *P. aeruginosa* PAO1. Measurements were performed three times.

## Supplementary Tables

Supplementary Table 1. Data collection and refinement statistics (molecular replacement)

### Data collection and structure refinement statistics of MucA<sup>peri</sup>-MucB complex.

|                                             |                                  |
|---------------------------------------------|----------------------------------|
| <b>Data collection</b>                      |                                  |
| Space group                                 | C222 <sub>1</sub>                |
| <b>Cell dimensions</b>                      |                                  |
| <i>a</i> , <i>b</i> , <i>c</i> (Å)          | 71.907 186.429 50.628            |
| $\alpha$ , $\beta$ , $\gamma$ (°)           | 90 90 90                         |
| Wavelength (Å)                              | 0.97853                          |
| Resolution (Å) <sup>a</sup>                 | 35.95-1.905(1.973-1.905)         |
| $R_{\text{sym}}$                            | 0.141(0.454)                     |
| Average $I/\sigma$ (I)                      | 15.57(4)                         |
| $R_{\text{meas}}$                           | 0.145(0.486)                     |
| $R_{\text{pim}}$                            | 0.042(0.174)                     |
| Completeness (%)                            | 98.90(92.26)                     |
| CC <sub>1/2</sub>                           | 0.746                            |
| Redundancy                                  | 10(7.2)                          |
| <b>Refinement</b>                           |                                  |
| Resolution (Å)                              | 35.95-1.905(1.973-1.905)         |
| No. of reflections                          | 26847 (2455)                     |
| $R_{\text{work}}/R_{\text{free}}$           | 0.1729/0.1929<br>(0.2085/0.2096) |
| <b>No. of atoms</b>                         |                                  |
| Protein                                     | 330                              |
| Ligand/ion                                  | 26                               |
| Water                                       | 186                              |
| B-factor from Wilson plot (Å <sup>2</sup> ) | 16.93                            |
| Average B-factor                            | 25.2                             |
| Protein                                     | 24.3                             |
| Ligand/ion                                  | 44.1                             |
| Water                                       | 34.9                             |
| <b>r.m.s.d.<sup>b</sup></b>                 |                                  |
| Bond lengths (Å)                            | 0.028                            |
| Bond angles (°)                             | 1.92                             |
| Number of TLS groups                        | 1                                |
| <b>Ramachandran plot</b>                    |                                  |
| (favored/allowed/ outliers)                 | 97.84/2.16/0                     |

a Values in parentheses are for the highest resolution shell.

b r.m.s.d. indicates root mean square deviation.

Supplementary Table 2. Bacterial strains, plasmids, constructs, oligos and sequences.

| <b>Bacterial strains and plasmids</b>               |                                                                                  |                       |
|-----------------------------------------------------|----------------------------------------------------------------------------------|-----------------------|
| Strains/Plasmids                                    | Genotype /phenotype                                                              | Source/reference      |
| Pseudomonas aeruginosa                              | strain ATCC 15692 /PAO1                                                          | Laboratory collection |
| Escherichia coli                                    | strain K12                                                                       | Laboratory collection |
| S17-1 Chemically Competent Cell (ZC1035 )           | RP4-2(Km::Tn7, Tc::Mu-1), pro-82, LAMpir, recA1, endA1, thiE1, hisdR17, creC5110 | Reference 23          |
| pET22b                                              | lac operator, cspA promoter, Amp <sup>r</sup>                                    | Laboratory collection |
| pCold                                               | T7/lacO promoter, ColE1 ori, F1 ori, Amp <sup>r</sup>                            | Laboratory collection |
| pEX18Gm                                             | lac operater, SacB Promoter, Gm <sup>r</sup>                                     | Reference 23          |
| pME6032                                             | Tac promoter, pVS1 ori, p15A ori, Tet <sup>r</sup>                               | Reference 24          |
| <b>Constructs, oligos and sequences</b>             |                                                                                  |                       |
| Constructs                                          | oligos and sequences (5' to 3')                                                  | Source/reference      |
| pET22b::MucA <sup>P<sub>ent</sub></sup> (106-194)-F | 5' TTAAGAAGGAGATACATATGTACAACCAGAACGACGCCCTGC 3'                                 | This work             |
| pET22b::MucA <sup>P<sub>ent</sub></sup> (106-194)-R | 5' GGTGGTGGTGGTGGTGCCTCGAGGCGGTTTTCCAGGCTGGCTGCC 3'                              | This work             |
| pET22b::MucB(Full Length)-F                         | 5' TTAAGAAGGAGATACATATGTATGATGCGCACCACTCCCTGTTCG 3'                              | This work             |
| pET22b::MucB(Full Length)-R                         | 5' GGTTGGTGGTGGTGGTGCCTCGAGTTTTCTGGGCGGCGCCCTCGGGC 3'                            | This work             |
| pEX18Gm::MucA-F                                     | 5' AACGACGGCCAGTGCCAAAGCTTCCCTGAGCCCGATGCAATCCATT 3'                             | This work             |
| pEX18Gm::MucA-R                                     | 5' TTCGAGCTCCGTACCCGGGATAAACCATGGCACCCGTGCAGCGGT 3'                              | This work             |
| pEX18Gm::MucB-F                                     | 5' AACGACGGCCAGTGCCAAAGCTTTCAGCAGTTGCCCGAGGATTG 3'                               | This work             |
| pEX18Gm::MucB-R                                     | 5' TTCGAGCTCCGTACCCGGGATGATGATGAAGCCGGAACCCAGCG 3'                               | This work             |
| pEX18Gm::ΔMucA-F                                    | 5' GGAGAGACATGCGCACCACTCCCTGTTGCTTTTGCTTGGCAGCC 3'                               | This work             |
| pEX18Gm::ΔMucA-R                                    | 5' AGCGATACCTCTTTGGCATTTCGCCGCTGTGTCAGGCTTCTCGCA 3'                              | This work             |
| pEX18Gm::ΔMucB-F                                    | 5' TCGAGGAGCAGGGGCGAGTGGTGGCGACCGAGCCGGGAGCGGTAT 3'                              | This work             |
| pEX18Gm::ΔMucB-R                                    | 5' GTCTCTCCTCAGCGGTTTTCCAGGCTGGCTGCCCGAGCGTAGGGC 3'                              | This work             |
| pME6032::MucA-F                                     | 5' CCGCTCGAGATGAGTCTGGAAGCCCTGCAGG 3'                                            | This work             |
| pME6032::MucA-R                                     | 5' CCGGAATTCTCAGCGGTTTTCCAGGCTGGCT 3'                                            | This work             |
| pME6032::MucB-F                                     | 5' CCGCTCGAGATGCGCACCACTCCCTGTTGC 3'                                             | This work             |
| pME6032::MucB-R                                     | 5' CCGGAATTCTCAGTGGTGGTGGTGGTGC 3'                                               | This work             |
| pCold::MucA <sub>(106-180)</sub> -F                 | 5' TCATCATCATCATCATATGGCCGCATGAACCAGAACGACGCCC 3'                                | This work             |
| pCold::MucA <sub>(106-180)</sub> -R                 | 5' GCTTTAAGCAGAGATTACCTACTCTGTACCCTGACGGCGGAT 3'                                 | This work             |
| pET22b::MucA(S153A)-R                               | 5' GGACGAGGAGTTGGTATCACC 3'                                                      | This work             |
| pET22b::MucA(S153A)-F                               | 5' GCCGATACCCGCTGGCATGAGC 3'                                                     | This work             |
| pET22b::MucA(W158A)-R                               | 5' GCGGGTATCGCTGGACGAGGAG 3'                                                     | This work             |
| pET22b::MucA(W158A)-F                               | 5' GCCCATGAGCAGCGTCTGCCGA 3'                                                     | This work             |
| pET22b::MucA(H159A)-R                               | 5' CCAGCGGATCGCTGGACGAG 3'                                                       | This work             |
| pET22b::MucA(H159A)-F                               | 5' GCCGAGCAGCGTCTGCCGATCT 3'                                                     | This work             |
| pET22b::MucA(R162A)-R                               | 5' CTGCTCATGCCAGCGGGTATCG 3'                                                     | This work             |
| pET22b::MucA(R162A)-F                               | 5' GCCCTGCCGATCTACCTGCGTC 3'                                                     | This work             |
| pET22b::MucA(Y166A)-R                               | 5' GATCGGCAGACGCTGCTCATGC 3'                                                     | This work             |
| pET22b::MucA(Y166A)-F                               | 5' GCCCTGCGTCAGCAGCTGCAAC 3'                                                     | This work             |
| pET22b::MucA(R168A)-R                               | 5' CAGGTAGATCGGCAGACGCTGC 3'                                                     | This work             |
| pET22b::MucA(R168A)-F                               | 5' GCCCAGCACGTGCAACAATCCG 3'                                                     | This work             |
| pET22b::MucA(Q169A)-R                               | 5' ACGCAGGTAGATCGGCAGACGC 3'                                                     | This work             |
| pET22b::MucA(Q169A)-F                               | 5' GCCCAGGTGCAACAATCCGCC 3'                                                      | This work             |
| pET22b::MucA(H170A)-R                               | 5' CTGACGCGAGGTAGATCGGCAGACGCTGCTC 3'                                            | This work             |
| pET22b::MucA(H170A)-F                               | 5' GCCGTGCAACAATCCGCCGTCAGTGGTACA 3'                                             | This work             |
| pET22b::MucA(Q172A)-R                               | 5' CACGTGCTGACGCAGGTAGATC 3'                                                     | This work             |
| pET22b::MucA(Q172A)-F                               | 5' GCCCAATCCGCCGTCAGTGGTA 3'                                                     | This work             |
| pET22b::MucA(Q173A)-R                               | 5' TTGCACGTGCTGACGCAGGTAG 3'                                                     | This work             |
| pET22b::MucA(Q173A)-F                               | 5' GCCTCCGCCGTCAGTGGTACAG 3'                                                     | This work             |
| pET22b::MucA(S177A)-R                               | 5' GACGGCGGATTGTGACACGTGC 3'                                                     | This work             |
| pET22b::MucA(S177A)-F                               | 5' GCCGGTACAGAGAGCGCGCTGC 3'                                                     | This work             |
| pET22b::MucA(E180A)-R                               | 5' TGTACCCTGACGGCGGATTGTTGCACGTG 3'                                              | This work             |
| pET22b::MucA(E180A)-F                               | 5' GCCAGCGCGCTGCCCTACGCTCGGGCAGCC 3'                                             | This work             |
| pET22b::MucA(Y185A)-R                               | 5' GGGCAGCGCGCTCTCTGTACCCTGACGGC 3'                                              | This work             |
| pET22b::MucA(Y185A)-F                               | 5' GCCGCTCGGGCAGCCAGCTGGAAAACCGC 3'                                              | This work             |
| pET22b::MucA(R187A)-R                               | 5' AGCGTAGGGCAGCGGCTCTCT 3'                                                      | This work             |
| pET22b::MucA(R187A)-F                               | 5' GCCCGAGCCAGCCCTGGAAAAC 3'                                                     | This work             |
| pET22b::MucA(S190A)-R                               | 5' GGCTGCCCGAGCGTAGGGCAGC 3'                                                     | This work             |
| pET22b::MucA(S190A)-F                               | 5' GCCCTGGAAAACCGCCTCGAGC 3'                                                     | This work             |
| pET22b::MucB(L31W)-F                                | 5' TGGGCCGAGGCCGATCGCCAGA 3'                                                     | This work             |
| pET22b::MucB(L31W)-R                                | 5' ACGATTACGCCAGTCGGAAGCG 3'                                                     | This work             |
| pET22b::MucB(F40W)-F                                | 5' TGGCAAGGCACCTTCGTCTACG 3'                                                     | This work             |
| pET22b::MucB(F40W)-R                                | 5' ACTGTTCTGGCGATCGGCCCTCG 3'                                                    | This work             |
| pET22b::MucB(L151W)-F                               | 5' TGGCACCTGGACCGGACACCG 3'                                                      | This work             |
| pET22b::MucB(L151W)-R                               | 5' CTCGAAGCCGTAGCCGCTGCTGG 3'                                                    | This work             |
| pET22b::MucB(L159W)-F                               | 5' TGGCCGTGAAGTGCCTGTGTC 3'                                                      | This work             |
| pET22b::MucB(L159W)-R                               | 5' GCCGGTGTCCGGTCCAGGTGC 3'                                                      | This work             |
| pET22b::MucB(F176W)-F                               | 5' TGGCAGTTCACCCAGTTGAATA 3'                                                     | This work             |
| pET22b::MucB(F176W)-R                               | 5' GCGCTCGAGCAACTGCCCTTC 3'                                                      | This work             |
| pET22b::MucB-NTD-F                                  | 5' CTCGAGCACCCACCACCACC 3'                                                       | This work             |
| pET22b::MucB-NTD-R                                  | 5' GACCTGGCATTCCGGCCTCC 3'                                                       | This work             |
| pET22b::MucB-NTD-P106A-F                            | 5' CCACAGTGGGCATCGGCCAGTTGG 3'                                                   | This work             |
| pET22b::MucB-NTD-P106A-R                            | 5' CCGGTGCGCAAGTTGATCCCTCCC 3'                                                   | This work             |
| pET22b::MucB-NTD-P112A-F                            | 5' ATCGAACTTGGCAGCCGGCCACAGC 3'                                                  | This work             |
| pET22b::MucB-NTD-P112A-R                            | 5' TACTCCAGCTGGCTTCTGTTACG 3'                                                    | This work             |

## Methods

### Sample preparation, Trypsin digestion and Mass spectrometry analysis

The mixture of MucB, AlgW, YVF peptide and 0.05% DDM were incubated in a lysis buffer consisting of 25 mM Tris-HCl (pH 7.5), 150 mM NaCl, 5 % glycerol at 37°C for 1h. Then in-gel digestion was performed using a method described<sup>1,2</sup>. Briefly, the lower band (around 25 KDa) was cut from the gels, and the gel pieces were washed three times for 15 min each with 200 µl of 50 mM ammonium bicarbonate with 50% (v/v) acetonitrile and then dried under vacuum. Then, the samples were reduced with 10 mM TCEP at 56°C for 1 h, and alkylated with 40mM CAA in the dark for 45 min. After reduced and alkylated, the colloidal particles were eluted with 25mM NH<sub>4</sub>HCO<sub>3</sub> for three times, and dehydrated with 50% ACN, 100% CAN until completely dried. Trypsin (1:50) was added to digest the proteins at 37°C overnight. Peptides were extracted with 5 µl of extracting solution (50% (v/v) acetonitrile and 0.3% (v/v) trifluoroacetic acid) for 10 min by sonication. Finally, the mass spectra were obtained using a liquid chromatography mass spectrometer (LC /MS) analyzer (orbitrap fusion lumos, Thermo Scientific), and searched the protein database of *Pseudomonas aeruginosa* PAO1 with the search through NCBI databases.

## References

- 1 Matsuura, K., Kadoyama, K. & Matsuyama, S. The influence of chronic nicotine treatment on proteins expressed in the mouse hippocampus and cortex. *European journal of pharmacology* **780**, 16-25, doi:10.1016/j.ejphar.2016.03.025 (2016).
- 2 Reginald, K. & Chew, F. T. The major allergen Derp2 is a cholesterol binding protein. *Sci Rep* **9**, 1556, doi:10.1038/s41598-018-38313-9 (2019).
